# Supplementary material for: Facile synthesis approach of bifunctional Co–Ni–Fe oxyhydroxide and spinel oxide composite electrocatalysts from hydroxide and layered double hydroxide composite precursors
Source: Royal Society of Chemistry journal article supplement (doi:10.1039/d2ra08096f), 2023-01-01
Supplement: d2ra08096f1.pdf [file d2ra08096f1.pdf]

1 Facile synthesis approach of bifunctional Co-Ni-  
2 Fe oxyhydroxide and spinel oxide composite  
3 electrocatalysts from hydroxide and layered  
4 double hydroxide composite precursor

5 *Shoo Kitano\**, *Yuki Sato*, *Reiko Tagsari*, *Ruijie Zhu*, *Damian Kowalski*, *Yoshitaka Aoki*,

6 *Hiroki Hamasaki\**

7 \*Sho Kitano: Division of Applied Chemistry, Faculty of Engineering, Hokkaido

8 University, Sapporo, Hokkaido 060-8628, Japan

9 Yuki Sato: Graduate School of Chemical Sciences and Engineering, Hokkaido

10 University, Sapporo, Hokkaido 060-8628, Japan

11 Reiko Tag sari: Graduate School of Chemical Sciences and Engineering, Hokkaido

12 University, Sapporo, Hokkaido 060-8628, Japan

13 Ruijie Zhu: Graduate School of Chemical Sciences and Engineering, Hokkaido

14 University, Sapporo, Hokkaido 060-8628, Japan

- 1 Damian Kowalski: Biological and Chemical Research Centre (CNBC), Faculty of
- 2 Chemistry, University of Warsaw, ul. Żytki i Wigury 101, 02-089, Warsaw, Poland
- 3 Yoshitaka Aoki: Division of Applied Chemistry, Faculty of Engineering, Hokkaido
- 4 University, Sapporo, Hokkaido 060-8628, Japan
- 5 \*Hiroki Hamasaki: Division of Applied Chemistry, Faculty of Engineering, Hokkaido
- 6 University, Sapporo, Hokkaido 060-8628, Japan
- 7
- 8

1 **Table S1** Metal composition ratio of the reaction solution and prepared catalysts  
 2 measured by SEM-EDX.

| Solution (at.%) |    |    | Catalyst (at.%) |    |    |
|-----------------|----|----|-----------------|----|----|
| Co              | Ni | Fe | Co              | Ni | Fe |
| 85              | 5  | 10 | 72              | 6  | 22 |
| 78              | 15 | 7  | 65              | 20 | 15 |
| 88              | 10 | 2  | 84              | 12 | 4  |
| 90              | 5  | 5  | 80              | 6  | 14 |
| 85              | 10 | 5  | 74              | 13 | 13 |
| 95              | -  | 5  | 94              | -  | 6  |
| 95              | 5  | -  | 80              | 20 | -  |

3

4

5

1  
2  
  
3  
4  
5  
6  
7  
8

**Table S2** Metal composition ratio of the prepared catalysts measured by ICP-AES.

| Catalyst (at.%) |    |    |
|-----------------|----|----|
| Co              | Ni | Fe |
| 69              | 6  | 25 |
| 63              | 21 | 16 |
| 83              | 12 | 5  |
| 78              | 7  | 15 |
| 73              | 13 | 14 |
| 89              | -  | 11 |
| 79              | 21 | -  |

1

2 **Table S3** Activity comparison of several bifunctional electrocatalysts.

| Catalyst                                                                            | $E_{1/2}$<br>(V vs RHE) | $E_{di=10}$<br>(V vs RHE) | $\Delta E$ (V) | Ref.      |
|-------------------------------------------------------------------------------------|-------------------------|---------------------------|----------------|-----------|
| $\text{Co}_{74}\text{Ni}_{13}\text{Fe}_{13}$ (150)                                  | 0.87                    | 1.51                      | 0.64           | This work |
| $\text{MnFe}_2\text{O}_4/\text{NiCo}_2\text{O}_4$                                   | 0.83                    | 1.56                      | 0.73           | 1         |
| $\text{Mn}_3\text{O}_4@\text{CoMn}_2\text{O}_4\text{-Co}_x\text{O}_y$               | 0.83                    | 1.68                      | 0.85           | 2         |
| $\text{CuCoO}_x/\text{FeOOH}$                                                       | 0.78                    | 1.5                       | 0.72           | 3         |
| $\text{Pd}@\text{PdO-Co}_3\text{O}_4$                                               | 0.75                    | 1.56                      | 0.81           | 4         |
| $\text{MnO}_2/\text{La}_{0.7}\text{Sr}_{0.3}\text{MnO}_3$                           | 0.76                    | 1.82                      | 1.06           | 5         |
| $\text{Co}_3\text{O}_4@\text{NiFe}$ LDHs                                            | 0.77                    | 1.55                      | 0.78           | 6         |
| $\text{MnO}@\text{Co-N/C}$                                                          | 0.83                    | 1.76                      | 0.93           | 7         |
| nNiFe LDH/3D MPC                                                                    | 0.86                    | 1.57                      | 0.71           | 8         |
| $\text{MnVO}_x@\text{N-rGO}$                                                        | 0.80                    | 1.65                      | 0.85           | 9         |
| $\text{FeCoOOH-NS/NF}$ 3D-FeNC                                                      | 0.855                   | 1.46                      | 0.605          | 10        |
| $\text{Mn}_{0.5}(\text{Fe}_{0.3}\text{Ni}_{0.7})_{0.5}\text{O}_x/\text{MWCNTs-O}_x$ | 0.84                    | 1.57                      | 0.73           | 11        |
| $\text{NiCo}_2\text{O}_4/\text{Co,N-CNTs}$ NCs                                      | 0.862                   | 1.569                     | 0.707          | 12        |

3

4

5

6

7

1 **Table S4** Activity and durability comparison of several air-electrodes.

| Catalyst                                              | $E_{1/2}$<br>(V vs RHE) | vs          | $E_{j=10}$<br>(V vs RHE) | vs          | $\Delta E$ (V) | Durability<br>(h(cycle)) | Current<br>density | Ref.         |
|-------------------------------------------------------|-------------------------|-------------|--------------------------|-------------|----------------|--------------------------|--------------------|--------------|
| $\text{Co}_{74}\text{Ni}_{13}\text{Fe}_{13}$<br>(150) | 0.76                    |             | 1.48                     |             | 0.72           | 550 (260)                | 20                 | This<br>work |
| $\text{Ca}_2\text{FeCoO}_5$                           | 0.62                    |             | 1.51                     |             | 0.89           | 200 (100)                | 20                 | 13           |
| $\text{NiCo}_2\text{O}_4$<br>@FeNi LDH                | -0.18                   | (vs Hg/HgO) | 0.43                     | (vs Hg/HgO) | 0.61           | 20(20)                   | 20                 | 14           |
| $\text{MnCo}_2\text{O}_4$                             | 0.91                    |             | 1.57                     |             | 0.66           | 20(10)                   | 20                 | 15           |
| $\text{NiFeO@MnO}_x$                                  | 0.805                   |             | 1.593                    |             | 0.788          | 20(300)                  | 5(OER),<br>3(ORR)  | 16           |

2

3

4

1

2

3

**Table S5** The ratio of metals dissolved in the electrolyte to the total amount of catalyst during the durability cycle test.

4

| Dissolution (at.%) |      |      |
|--------------------|------|------|
| Co                 | Ni   | Fe   |
| 0.032              | 0.11 | 0.21 |

5

6

7

1 **Table S6** Performance comparison of the Co<sub>74</sub>Ni<sub>13</sub>Fe<sub>13</sub> (150) and state-of-the-art catalysts.

| Catalyst                                                             | Open circuit potential (V) | Power density (mW cm <sup>-2</sup> ) | Durability (h (cycle)) | Current density (mA cm <sup>-2</sup> ) | Ref.      |
|----------------------------------------------------------------------|----------------------------|--------------------------------------|------------------------|----------------------------------------|-----------|
| Co <sub>74</sub> Ni <sub>13</sub> Fe <sub>13</sub> (150)             | -                          | 195                                  | 430 (1290)             | 10                                     | This work |
| NP-Co <sub>3</sub> O <sub>4</sub> /CC                                | 1.58                       | 200                                  | 400                    | 5                                      | 17        |
| CeO <sub>2</sub> /Co <sub>3</sub> O <sub>4</sub> @NC                 | 1.41                       | 117                                  | (350)                  | 5                                      | 18        |
| (FeCoNi) <sub>3</sub> O <sub>4</sub> /Mn <sub>3</sub> O <sub>4</sub> | 1.44                       | 136                                  | 400 (2400)             | 2                                      | 19        |
| Ni MnO/CNF                                                           | 1.59                       | 139                                  | 120 (350)              | 10                                     | 20        |
| Co <sub>9</sub> S <sub>8</sub> /CNT                                  | 1.3                        | 200                                  | 96 (576)               | 10                                     | 21        |
| FeCo-DHO/NCNTs                                                       | 1.4                        | 193                                  | 300 (1800)             | 5                                      | 22        |
| CoNi@NCNT/NF                                                         | 1.4                        | 127                                  | 90                     | 5                                      | 23        |
| P-Co <sub>3</sub> O <sub>4</sub> NWs                                 | 1.42                       | 72.1                                 | 500 (500)              | 2                                      | 24        |
| CoO/Co <sub>x</sub> P                                                | 1.4                        | 123                                  | 200 (400)              | 5                                      | 25        |
| Co@Co <sub>3</sub> O <sub>4</sub> @NC-900                            | -                          | 64                                   | 200 (100)              | 5                                      | 26        |
| FeCo@MNC                                                             | 1.4                        | 115                                  | 24 (144)               | 20                                     | 27        |
| Co <sub>2</sub> FeO <sub>4</sub> /NCNTs                              | 1.43                       | 91                                   | 100 (600)              | 50                                     | 28        |

2

3



1

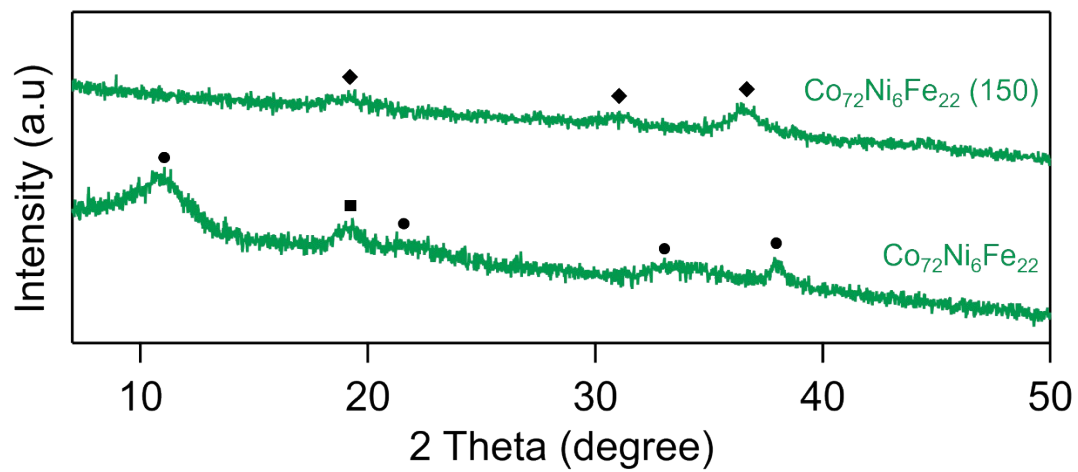

2

3 **Figure S1.** XRD patterns of the Co<sub>72</sub>Ni<sub>6</sub>Fe<sub>22</sub> and Co<sub>72</sub>Ni<sub>6</sub>Fe<sub>22</sub>(150) (circle: LDH,  
4 square: hydroxide, diamond: spinel oxide).

5

6

1

2

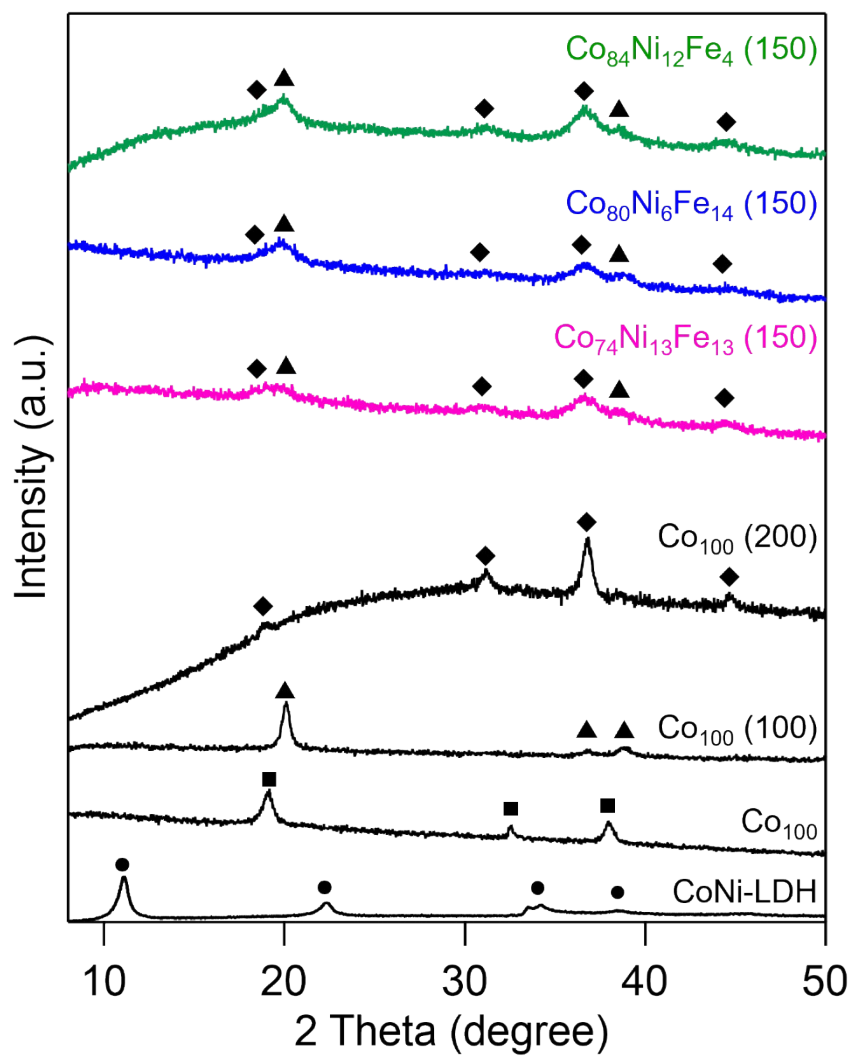

3

4 **Figure S2.** XRD patterns of the composite catalysts calcined at 150°C,  $\text{Co}_{100}$ ,  
5 corresponding calcined  $\text{Co}_{100}$  samples and CoNi-LDH reference (circle: LDH, square:  
6 hydroxide, triangle: oxyhydroxide, diamond: spinel oxide).

7

8

1

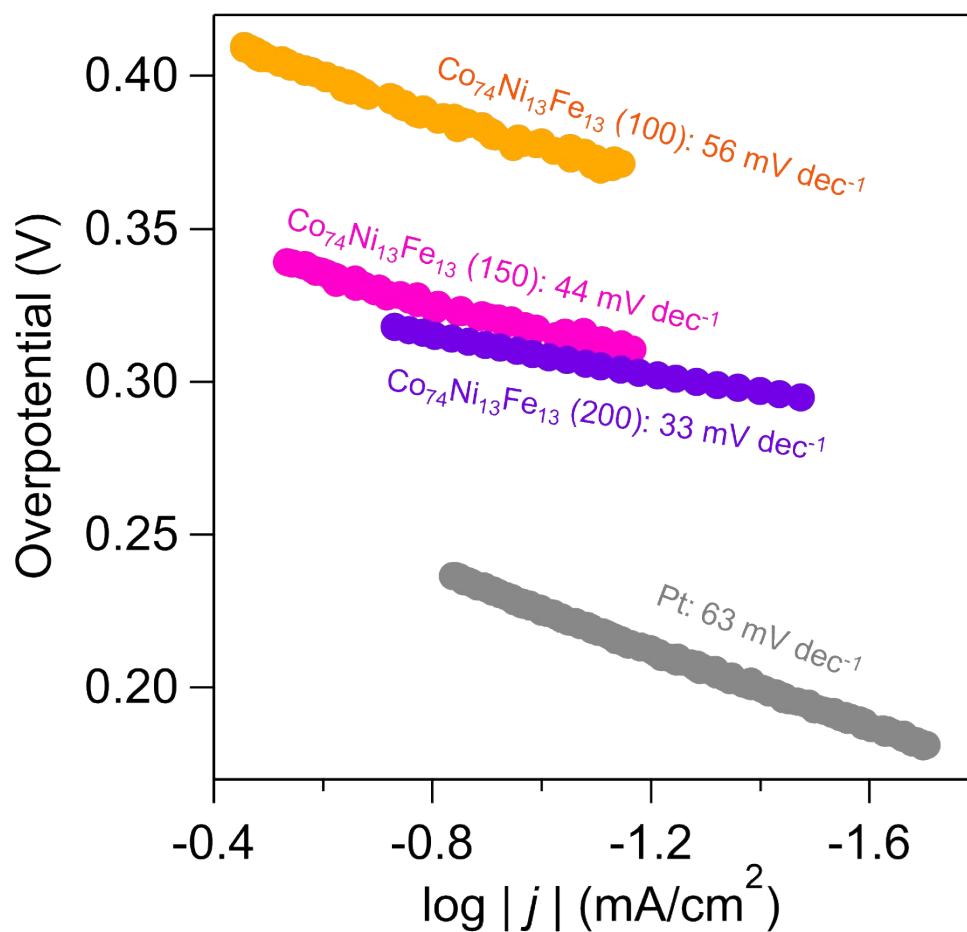

2

3 **Figure S3.** Tafel slopes of the Co<sub>74</sub>Ni<sub>13</sub>Fe<sub>13</sub> (T) catalysts and Pt/C for ORR in an O<sub>2</sub>-  
4 saturated 4 mol dm<sup>-3</sup> KOH solution.

5

6

1

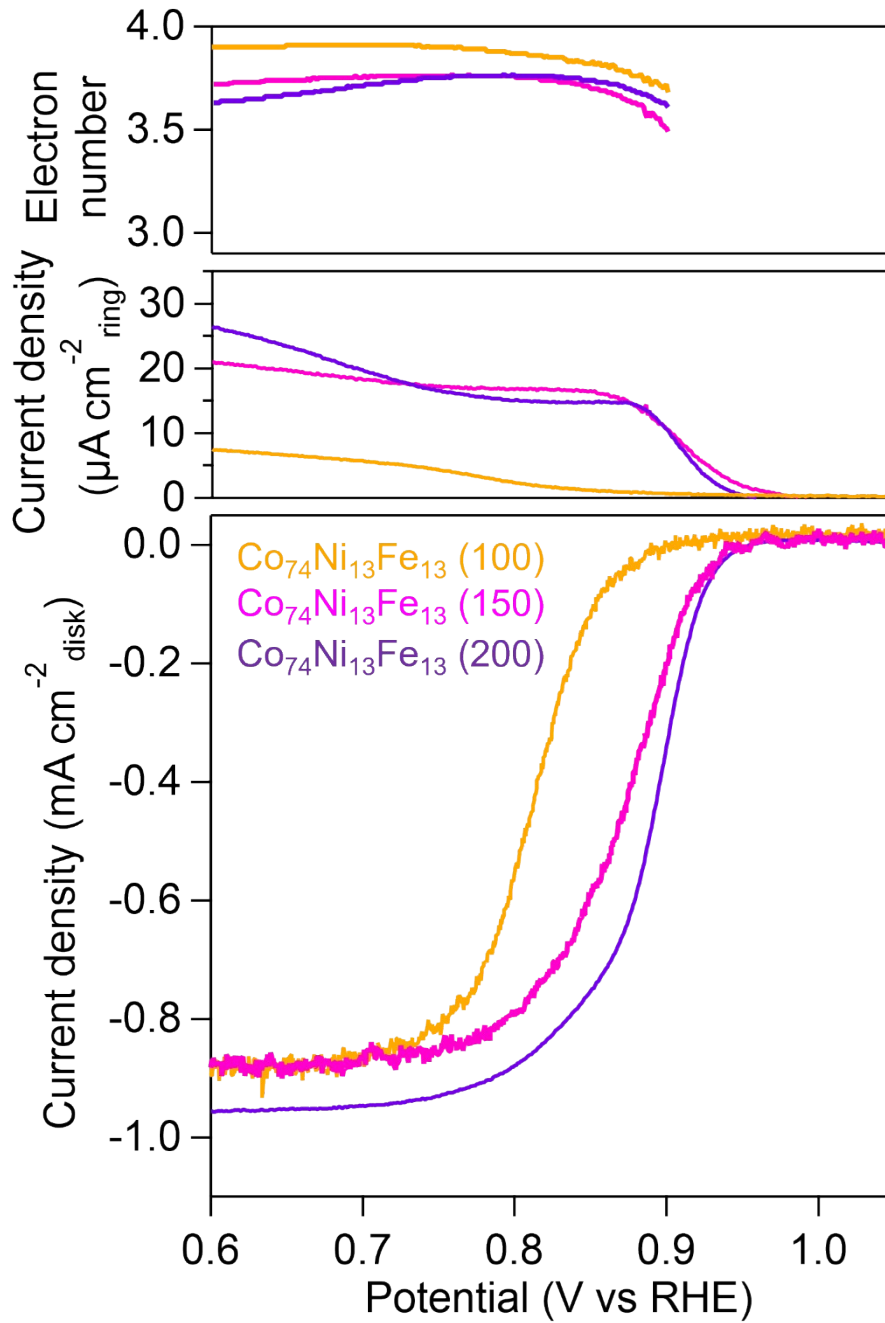

2

3 **Figure S4.** Disk current, ring current and electron number of the Co<sub>74</sub>Ni<sub>13</sub>Fe<sub>13</sub> (T)  
4 catalysts for ORR in an O<sub>2</sub>-saturated 4 mol dm<sup>-3</sup> KOH solution.

5

6

1

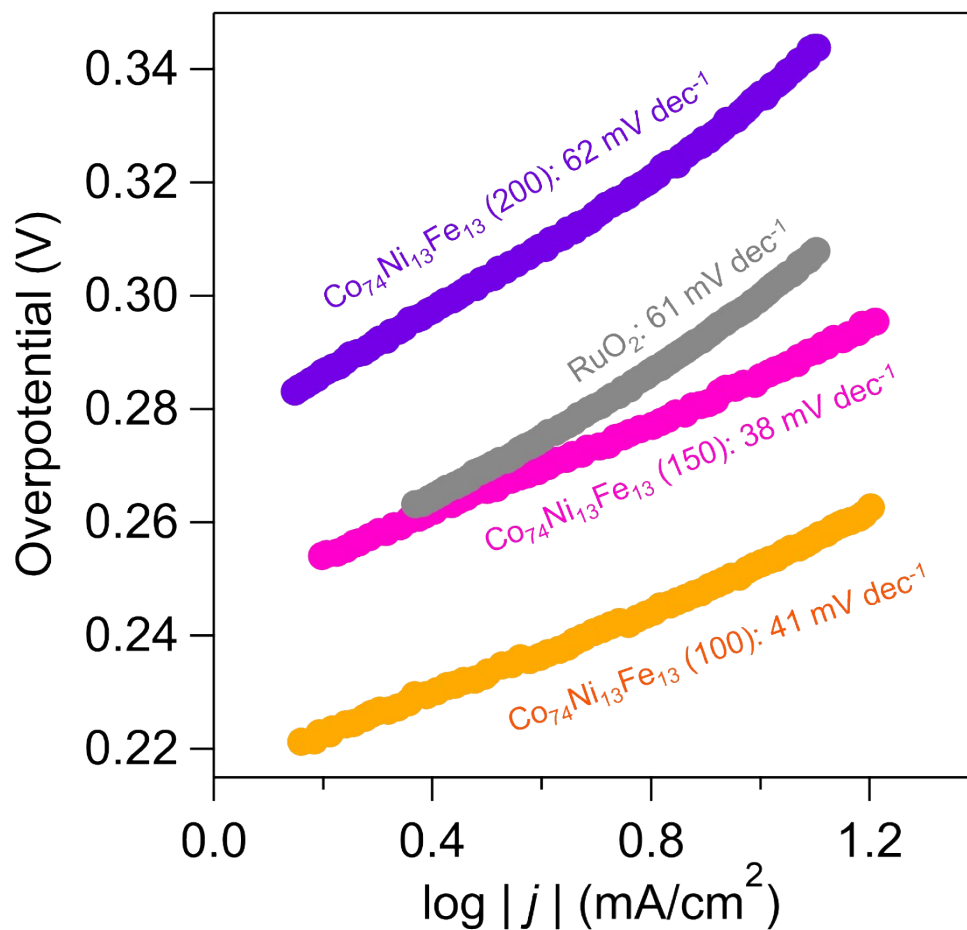

2

3 **Figure S5.** Tafel slopes of the  $\text{Co}_{74}\text{Ni}_{13}\text{Fe}_{13}$  (T) catalysts and  $\text{RuO}_2$  for OER in  $\text{O}_2$ -  
4 saturated 4 mol dm<sup>-3</sup> KOH solution.

5

6

1

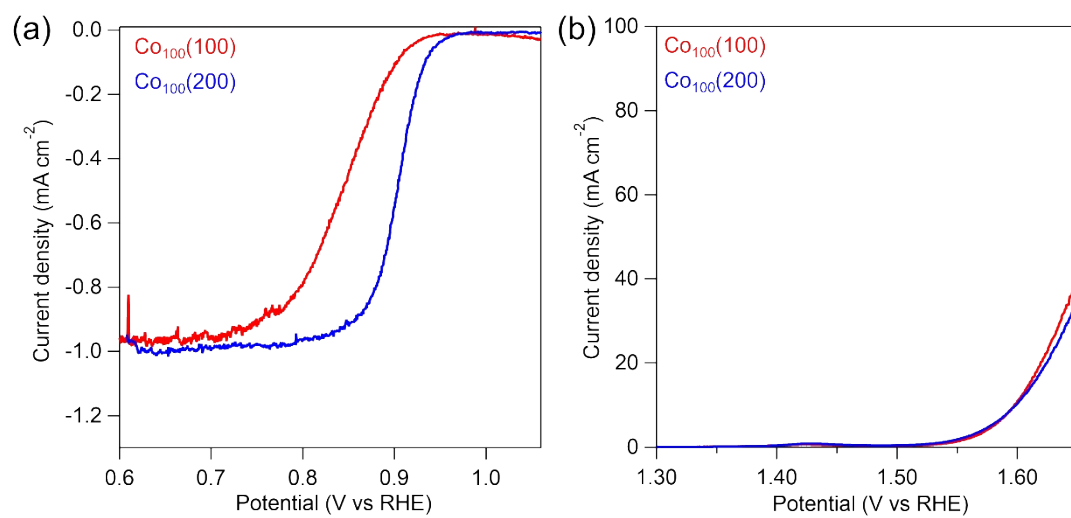

2

3 **Figure S6.** Polarization curves of the Co<sub>100</sub>(150) and Co<sub>100</sub>(200) for (a) ORR and (b)  
4 OER in O<sub>2</sub>-saturated 4 mol dm<sup>-3</sup> KOH solution.

5

1

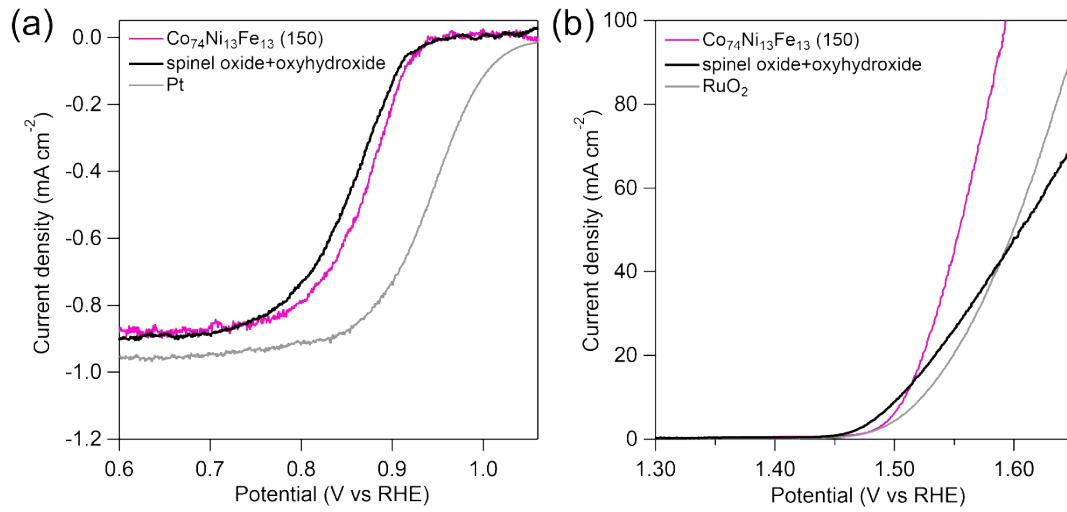

2

3 **Figure S7.** Polarization curves of the Co<sub>74</sub>Ni<sub>13</sub>Fe<sub>13</sub>(150), physically mixed sample, Pt  
4 and RuO<sub>2</sub> for (a) ORR and (b) OER in O<sub>2</sub>-saturated 4 mol dm<sup>-3</sup> KOH solution. The  
5 physically mixed sample was prepared by mixing equal amounts of the Co<sub>74</sub>Ni<sub>13</sub>Fe<sub>13</sub>(100)  
6 and Co<sub>74</sub>Ni<sub>13</sub>Fe<sub>13</sub>(200) using an agate mortar.

7

8

1

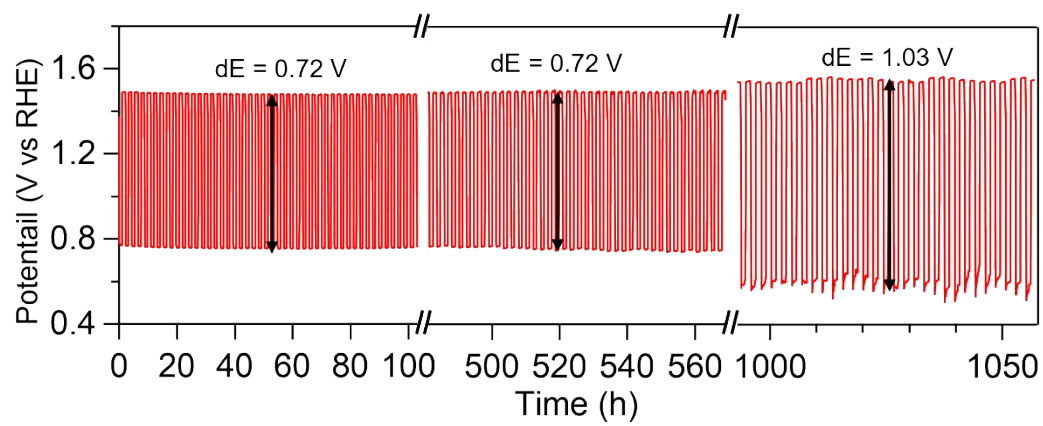

2

3 **Figure S8.** Charge-discharge cycle performance of the  $\text{Co}_{74}\text{Ni}_{13}\text{Fe}_{13}(150)$  air-electrode  
4 at  $20 \text{ mA cm}^{-2}$  in  $4 \text{ mol dm}^{-3}$  KOH aqueous solution.

5



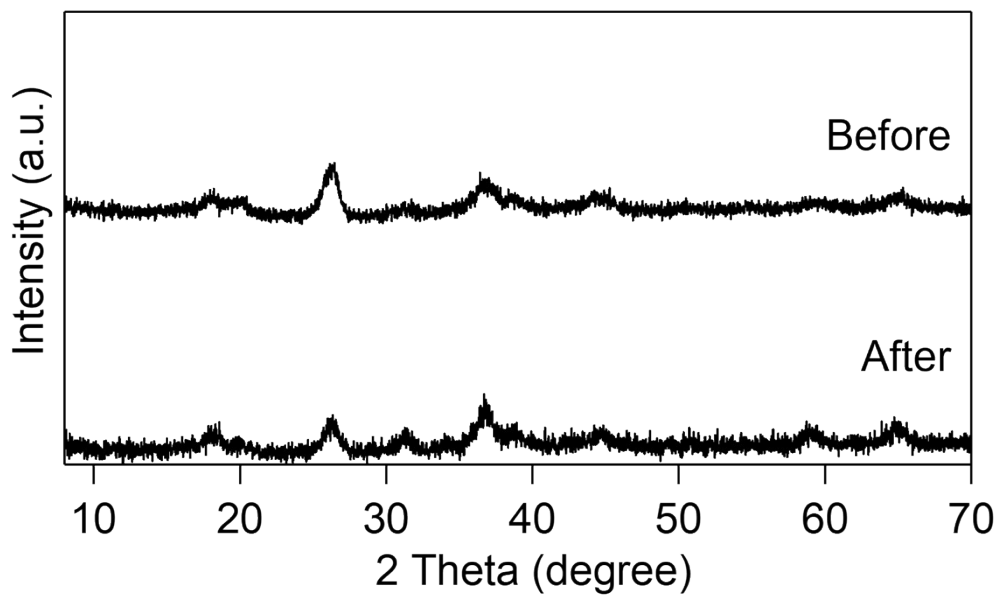

1

2 **Figure S9.** XRD patterns of the  $\text{Co}_{74}\text{Ni}_{13}\text{Fe}_{13}$  (150) air-electrode before and after cycle

3 test.

4

1

2

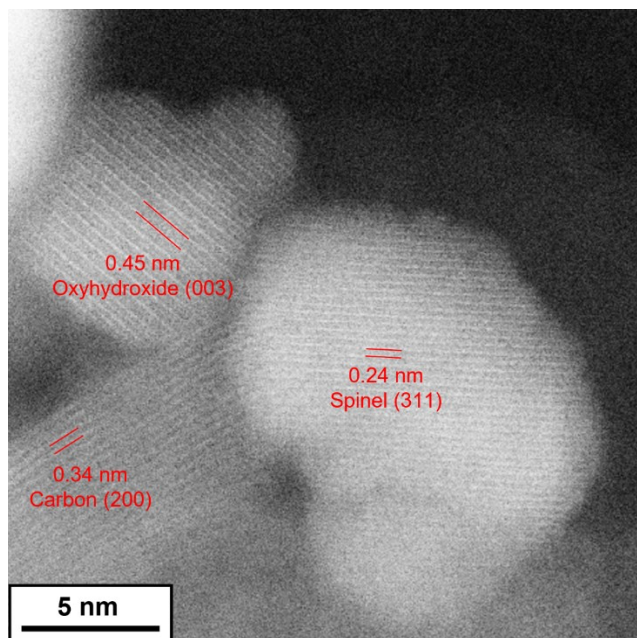

3

4 **Figure S10.** HAADF-STEM image of the catalyst layer of air-electrode after cycle  
5 test.

6

1

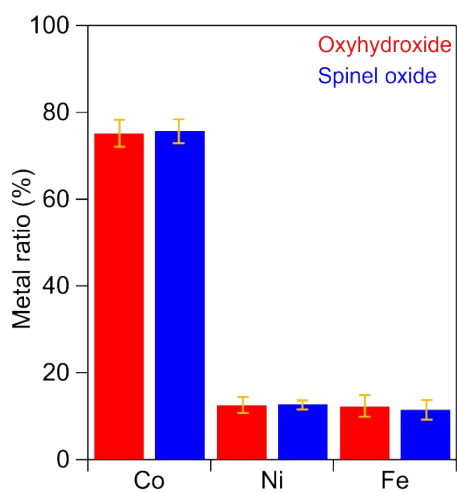

2

3 **Figure S11.** Metal composition ratio of oxyhydroxide and spinel oxide constituting  
4 the  $\text{Co}_{74}\text{Ni}_{13}\text{Fe}_{13}$  (150) catalyst after the cycle test.

5

1

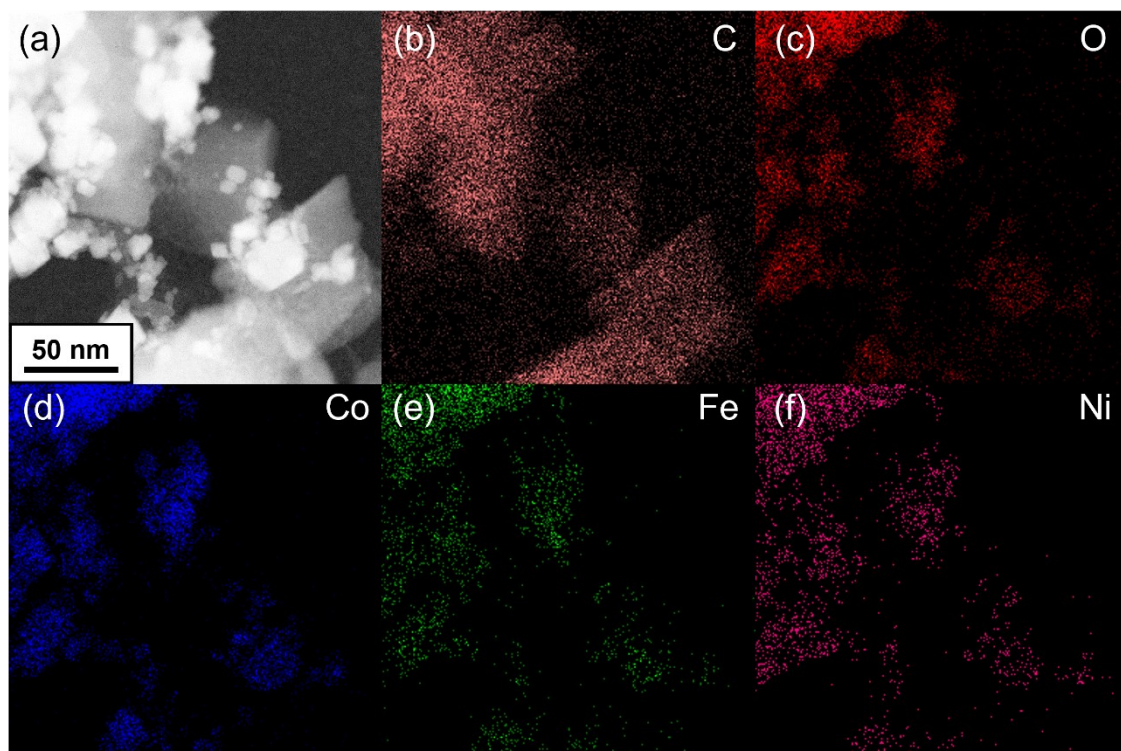

2

3 **Figure S12.** (a) HAADF-STEM image and STEM-EDX maps for (b) C-K, (c) O-K,  
4 (d) Co-K, (e) Fe-K and (f) Ni-K of the catalyst layer of air-electrode after the cycle test.

5

## 1 References

- 2 1. Y. Q. Zhang, M. Li, B. Hua, Y. Wang, Y. F. Sun and J. L. Luo, *Appl Catal B-Environ*, 2018, **236**,  
3 413-419.
- 4 2. Z. S. Luo, E. Irtem, M. Ibanez, R. Nafria, S. Marti-Sanchez, A. Genc, M. de la Mata, Y. Liu, D.  
5 Cadavid, J. Llorca, J. Arbiol, T. Andreu, J. R. Morante and A. Cabot, *Acs Appl Mater Inter*, 2016,  
6 **8**, 17435-17444.
- 7 3. M. Kuang, Q. H. Wang, H. T. Ge, P. Han, Z. X. Gu, A. M. Al-Enizi and G. F. Zheng, *Acs Energy*  
8 *Lett*, 2017, **2**, 2498-2505.
- 9 4. H. C. Li, Y. J. Zhang, X. Hu, W. J. Liu, J. J. Chen and H. Q. Yu, *Adv Energy Mater*, 2018, **8**.
- 10 5. S. S. Yan, Y. J. Xue, S. H. Li, G. J. Shao and Z. P. Liu, *Acs Appl Mater Inter*, 2019, **11**, 25870-  
11 25881.
- 12 6. X. L. Guo, X. L. Hu, D. Wu, C. Jing, W. Liu, Z. L. Ren, Q. N. Zhao, X. P. Jiang, C. H. Xu, Y. X.  
13 Zhang and N. Hu, *Acs Appl Mater Inter*, 2019, **11**, 21506-21514.
- 14 7. Y. N. Chen, Y. B. Guo, H. J. Cui, Z. J. Xie, X. Zhang, J. P. Wei and Z. Zhou, *J Mater Chem A*, 2018,  
15 **6**, 9716-9722.
- 16 8. W. Wang, Y. C. Liu, J. Li, J. Luo, L. Fu and S. L. Chen, *J Mater Chem A*, 2018, **6**, 14299-14306.
- 17 9. X. L. Xing, R. J. Liu, K. C. Cao, U. Kaiser, G. J. Zhang and C. Streb, *Acs Appl Mater Inter*, 2018,  
18 **10**, 44511-44517.
- 19 10. S. Ibraheem, S. G. Chen, J. Li, Q. M. Wang and Z. D. Wei, *J Mater Chem A*, 2019, **7**, 9497-9502.
- 20 11. D. M. Morales, M. A. Kazakova, S. Dieckhofer, A. G. Selyutin, G. V. Golubtsov, W. Schuhmann  
21 and J. Masa, *Adv Funct Mater*, 2020, **30**.
- 22 12. J. Li, S. Q. Lu, H. L. Huang, D. H. Liu, Z. B. Zhuang and C. L. Zhong, *Acs Sustain Chem Eng*, 2018,  
23 **6**, 10021-+.
- 24 13. E. Tsuji, T. Motohashi, H. Noda, D. Kowalski, Y. Aoki, H. Tanida, J. Niikura, Y. Koyama, M.  
25 Mori, H. Arai, T. Ioroi, N. Fujiwara, Y. Uchimoto, Z. Ogumi and H. Habazaki, *Chemsuschem*,  
26 2017, **10**, 2864-2868.
- 27 14. L. Wan, Z. H. Zhao, X. X. Chen, P. F. Liu, P. C. Wang, Z. Xu, Y. Q. Lin and B. G. Wang, *Acs*  
28 *Sustain Chem Eng*, 2020, **8**, 11079-11087.
- 29 15. Y. Sato, S. Kitano, D. Kowalski, Y. Aoki, N. Fujiwara, T. Ioroi and H. Habazaki, *Electrochemistry*,  
30 2020, **88**, 566-573.
- 31 16. Y. Cheng, S. Dou, M. Saunders, J. Zhang, J. Pan, S. Y. Wang and S. P. Jiang, *J Mater Chem A*,  
32 2016, **4**, 13881-13889.
- 33 17. X. Wang, Z. Q. Liao, Y. B. Fu, C. Neumann, A. Turchanin, G. Nam, E. Zschech, J. Cho, J. Zhang  
34 and X. L. Feng, *Energy Storage Mater*, 2020, **26**, 157-164.
- 35 18. X. B. He, X. R. Yi, F. X. Yin, B. H. Chen, G. R. Li and H. Q. Yin, *J Mater Chem A*, 2019, **7**, 6753-  
36 6765.

- 1 19. S. Y. Li, X. Y. Zhou, G. Fang, G. Q. Xie, X. J. Liu, X. Lin and H. J. Qiu, *Acs Appl Energ Mater*,  
2 2020, **3**, 7710-7718.
- 3 20. D. X. Ji, J. G. Sun, L. D. Tian, A. Chinnappan, T. R. Zhang, W. A. D. M. Jayathilaka, R. Gosh, C.  
4 Baskar, Q. Y. Zhang and S. Ramakrishna, *Adv Funct Mater*, 2020, **30**.
- 5 21. H. Li, Z. Guo and X. W. Wang, *J Mater Chem A*, 2017, **5**, 21353-21361.
- 6 22. M. J. Wu, Q. L. Wei, G. X. Zhang, J. L. Qiao, M. X. Wu, J. H. Zhang, Q. J. Gong and S. H. Sun,  
7 *Adv Energy Mater*, 2018, **8**.
- 8 23. W. H. Niu, S. Pakhira, K. Marcus, Z. Li, J. L. Mendoza-Cortes and Y. Yang, *Adv Energy Mater*,  
9 2018, **8**.
- 10 24. B. S. Tang, J. Yang, Z. K. Kou, L. Xu, H. L. Seng, Y. N. Xie, A. D. Handoko, X. X. Liu, Z. W. Seh,  
11 H. Kawai, H. Gong and W. F. Yang, *Energy Storage Mater*, 2019, **23**, 1-7.
- 12 25. Y. Niu, M. L. Xiao, J. B. Zhu, T. T. Zeng, J. D. Li, W. Y. Zhang, D. Su, A. P. Yu and Z. W. Chen,  
13 *J Mater Chem A*, 2020, **8**, 9177-9184.
- 14 26. Z. Y. Guo, F. M. Wang, Y. Xia, J. L. Li, A. G. Tamirat, Y. R. Liu, L. Wang, Y. G. Wang and Y. Y.  
15 Xia, *J Mater Chem A*, 2018, **6**, 1443-1453.
- 16 27. C. L. Li, M. C. Wu and R. Liu, *Appl Catal B-Environ*, 2019, **244**, 150-158.
- 17 28. X. T. Wang, T. Ouyang, L. Wang, J. H. Zhong, T. Y. Ma and Z. Q. Liu, *Angew Chem Int Edit*, 2019,  
18 **58**, 13291-13296.
- 19
